# Supplementary material for: The morphology and structural features of self-aggregating hexapeptides with antibiofilm formation activity
Source: Royal Society of Chemistry journal article supplement (doi:10.1039/d3ma00014a), 2023-01-01
Supplement: d3ma00014a1.pdf [file d3ma00014a1.pdf]

*Materials Advances*

**The morphology and structure features of amyloid fibrils fibrillated by hexapeptides with antibiofilm formation activity**

Dongru Chen<sup>1,#</sup>, Tingyu Wang<sup>1,#</sup>, Yiyi Huang<sup>2</sup>, Yucong Chen<sup>2</sup>, Huancai Lin<sup>2,\*</sup>, Liping Wu<sup>1,\*</sup>

1 Department of Orthodontics, Hospital of Stomatology, Guanghua School of Stomatology, Sun Yat-sen University. Guangdong Provincial Key Laboratory of Stomatology. Guangzhou, Guangdong, China

2 Department of Preventive Dentistry, Hospital of Stomatology, Guanghua School of Stomatology, Sun Yat-sen University. Guangdong Provincial Key Laboratory of Stomatology. Guangzhou, Guangdong, China

\*Corresponding author: Liping Wu, Email: wulping@mail.sysu.edu.cn. Huancai Lin, Email: linhc@mail.sysu.edu.cn.

# These authors contributed equally to this work.

**Supplementary Table 1 The first 10 hexapeptides with highest Rosetta energy predicted by ZipperDB**

---

| Sequence | Rosetta energy | Antimicrobial effects (Yes or No) | Antibiofilm effects (Yes or No) |
|----------|----------------|-----------------------------------|---------------------------------|
| LFWLVF   | -78.6          | No                                | Yes                             |
| MTVGEE   | -59.1          | No                                | No                              |
| CKNIYS   | -53.4          | No                                | No                              |
| LKSHQR   | -53.4          | No                                | No                              |
| CVNAIA   | -53.4          | No                                | No                              |
| CVQAQY   | -51.2          | No                                | No                              |
| GMSTFI   | -51            | No                                | No                              |
| EQIQYY   | -49.6          | No                                | No                              |
| SSTLSL   | -49.6          | No                                | No                              |
| TREEKV   | -49.5          | No                                | No                              |

---

**Supplementary Table 2 Peak position and the corresponding secondary structure assignment**

| Position(cm <sup>-1</sup> ) | Secondary structure assignment |
|-----------------------------|--------------------------------|
| 1600-1640, 1670-1680        | $\beta$ -sheets                |
| 1640-1650                   | Random coils                   |
| 1650-1660                   | $\alpha$ -helices              |
| 1660-1670, 1680-1700        | $\beta$ -turns                 |

**Supplementary Table 3 The secondary structures features of ASAPs (H5 and H12) and non-ASAPs (H18 and H21) analyzed by circular dichroism (CD)**

|           |              | Helix | Sheet | Turn | Unordered |
|-----------|--------------|-------|-------|------|-----------|
| ASAPs     | H5 monomers  | 3.7   | 43.7  | 21.2 | 31.4      |
|           | H5 fibrils   | 3.5   | 42.4  | 21.2 | 32.9      |
|           | H12 monomers | 3.7   | 42.3  | 21.4 | 32.7      |
|           | H12 fibrils  | 3.4   | 42.6  | 21.4 | 32.7      |
| non-ASAPs | H18 monomers | 3.3   | 42.3  | 21.3 | 33.0      |
|           | H18 fibrils  | 3.0   | 43.9  | 20.4 | 32.8      |
|           | H21 monomers | 3.5   | 41.9  | 21.3 | 33.2      |
|           | H21 fibrils  | 3.4   | 42.1  | 20.7 | 33.9      |
